# Supplementary material for: Solanum lycopersicum cytokinin response factor (SlCRF) genes: characterization of CRF domain-containing ERF genes in tomato
Source: PubMed Central journal article supplement — J Exp Bot. 2011 Nov 7;63(2):973–82. doi: 10.1093/jxb/err325 (PMC3254692; doi:10.1093/jxb/err325), 2011-11-07
Supplement: supp_err325_00065094-file001.pdf [file supp_err325_00065094-file001.pdf]

*Solanum lycopersicum* Cytokinin Response Factors (*SICRFs*): characterization of CRF domain containing ERF genes in tomato. *X Shi, S Gupta, and AM Rashotte.*

SUPPLEMENTARY TABLE S1.

| <u>Gene Name</u>   | <u>Chromosome/Position (Build 2.40)</u> | <u>Gene Model</u> | <u>Size (AA/bp)</u> |
|--------------------|-----------------------------------------|-------------------|---------------------|
| <i>SICRF1/Pti6</i> | Ch 6 (44654446- 44653700)               | Solyc06g082590    | 248/747             |
| <i>SICRF2</i>      | Ch 8 (62045738-62046757)                | Solyc08g081960    | 340/1023            |
| <i>SICRF3</i>      | Ch 1 (2911579-2910313)                  | Solyc01g008890    | 344/1035            |
| <i>SICRF4</i>      | Ch 3 (2016125-2014935)                  | Solyc03g007460    | 396/1191            |
| <i>SICRF5</i>      | Ch 1 (78502891-78503773)                | Solyc01g095500    | 293/882             |
| <i>SICRF6</i>      | Ch 6 (32043471-32044523)                | Solyc06g051840    | 350/1053            |
| <i>SICRF7</i>      | Ch 1 (14595809-14596333)                | Solyc01g014720    | 174/525             |
| <i>SICRF8</i>      | Ch 1 (2901188-2900649)                  | Solyc01g008880    | 175/540             |
| <i>SICRF9</i>      | Ch 3 (62191449-62190256)                | Solyc03g119580    | 397/1194            |
| <i>SICRF10</i>     | Ch 5 (3622457-3621438)                  | Solyc05g009450    | 339/1020            |
| <i>SICRF11</i>     | Ch 4 (874453-875505)                    | Solyc04g007180    | 350/1053            |

**SICRF1/Pti6** SL2.40ch06 (44654446- 44653700), BAC C06SLe0014B21.1 AC216656.1  
 Unigene SGN-U579886 Tomato 200607 Build 2 (26 members) GenBank # U89257.1  
 Lycopersicon esculentum DNA-binding protein Pti6 mRNA, complete cds and # AK323007  
 Solanum lycopersicum cDNA, clone from leaf.

SICRF1/Pti6 DNA Sequence (747bp)

**ATG**ACGGAAAATTCAGTTCGGTGATTAAATTCACTCAACACATAGTAACTACAAAC  
 AAGCATGTTTTTCTGAGCATAACGAAAAATCCAATTCAGAGTTACAAAGAGTTGTG  
 AGGATTATACTTACAGATGCCGATGCTACAGATTCTTCCGATGATGAAGGCCGGAAT  
 ACTGTACGGAGAGTGAAGAGGCACGTGACGGAGATCAACCTTATGCCGTCAACCAA  
 ATCGATCGGCGACAGAAAACGAAGATCGGTGTCTCCGGATTCTGACGTCACTCGTGC  
 GAAAAAGTTTAGAGGGCGTTCGTCAAAGACCGTGGGGTTCGTTGGGCTGCAGAGATTC  
 GGGACCCGACCCGGGGAAAACGGGTGTGGTTGGGTACTTATGACACCCCAAGAA  
 GCAGCTGTCGTTTACGATAAAGCTGCAGTTAAGCTCAAAGGTCCTGACGCCGTTACC  
 AATTTCCGGTATCAACAACGGCGGAGGTAACGGTGACGGTTACGGAAACCGAAAC  
 CGAGTCTGTTGCCGACGGTGGAGATAAAAGCGAAAACGATGTCGCTTTGTCACCCA  
 CCTCAGTTCTGTGACAATGATTTTGCGCCGTTTGACAATCTAGGGTTCTGCGAAGT  
 GGATGCTTTTGGTTTCGACGTTGATTCACTTTTCCGGCTGCCGGATTTTGCTATGACG  
 GAGAAATACTACGGCGATGAATTCGGCGAATTTGACTTTGACGATTTTGCCCTTGAA  
 GCTCGA**TAG**

SICRF1/Pti6 Protein sequence (248AA)

MTENSVPVIKFTQHIVTTNKHVFSHNEKSNSSELQRVVRIILTDADATDSSDDEGRNTRV  
 RVKRHVTEINLMPSTKSIGDRKRRSVSPDSVTRRKKFRGVRQRPWGRWAAEIRDPTRG  
 KRVWLGTYDTPEEAAVVYDKAAVKLKGPDVTFNFPVSTTAEVTVTVTETETESVADG  
 GDKSENDVALSPTSVLCDNDFAPFDNLGFCEVDAFGFDVDSLFRLPDFAMTEKYYGDEF  
 GEFDFDDFALEAR

## SICRF2

**SICRF2** SL2.40ch08 (62045738-62046757) SGN-U572081 gil147801286|embl|CAN77118.1  
Tomato 200607#2 [2 ESTs aligned] Genbank # AK321000 Solanum lycopersicum cDNA, clone  
from leaf

### SICRF2 DNA Sequence (1023bp)

**ATG**GACCAACAAACCATGTTGTCTAGTGGTGTTAAGTATACCGAACATAGAAAGCA  
AATCACTATGGTTAGACCAGCACCTCCGGTGACTTTTAATGGTCGGAGGAGAAGCTC  
TGAGATGAATGCTGCCGGTCCTAGAGTTGTAAGGATTACTGTTACTGATGCTGATGC  
TACTGACTCTTCGAGTGATGAAGGGGAACAGGGGTTTTATGGCCGTCAAAGAGTGA  
GAAAGTTTGTGAATGAAGTTCGGATAGAGCAGAGCAGCCACTGTAATGGAAGTGTA  
AATGGGGTTTTGAGAAATGGGTCATCGTCGGAAACTGCTCCCGTTGTCGCTGCAGCA  
CCGAAGAGGAGGAAGAAGACCGCCGGAGCAACAACGGCGGGCAGTAAGCTAAAAG  
TGAACCATGTTAAAAGTTTCGCGGGCGTACGGCAACGGCCTTGGGGCAAATGGGCG  
GCAGAAATCAGAGATCCACTGAGACGTGTACGGTTATGGTTAGGCACTTACGATACT  
GCTGAAGAAGCTGCCATGGTTTATGACCACGCGGCTATTCAGCTACGTGGGCCTGAC  
GCGCTCACAACTTCGGCCACTCCTCCGGCGACGAAAATCAGCTGCTTCCAGCTACA  
AATCCCGGCGAAGAATCGCACAAACGATCAACGCTCGCCGAAGTCCGTTTTACGATG  
TGCTTCAACTTCATTTGATGAATCTCAGAATAACGAGGAAGCCGAAGCTGAGTCATT  
ACCGATTTTACCCTCCGATATCAGGGACAAAAATGACATTTCCATGTCGGAAAACCT  
CTCCGATTTACCCCCGTTTCGAGAGTTTCTTCCCCGATGATTTGTTTCAGTTCGAGAAC  
CCGATTACCATATCCGACTTGTTTTTTGAACCGGATACTTTACCCGACTACAATAATA  
TGTTATTCGGGTCAAGTACTACAGATTACGGTTTCGGATCTTCATCCTGGCCCCGAAG  
AGGACTTCTTTCAGGATTTTCGGAGATGTATTCCGGTTTGACCCGCTTGTGGCTCTT**TG**  
**A**

### SICRF2 Protein Sequence (340AA)

MDQQTMLSSGVKYTEHRKQITMVRPAPPVTFNGRRRSSEMNAAGPRVVRITVTDADAT  
DSSSDEGEQGFYGRQRVRKVFNEVRIEQSSHCVNGSVNGVLRNGSSSETAPVVAAPKRR  
KKTAGATTAASKLKVNHVKKFRGVRQRPWGKWA AEIRDPLRRVRLWLGTYDTAE EA  
AMVYDHAAIQLRGPDALTNFGHSSGDENQLLPATNPGEESHNDQRSPKSVLRCASTSFD  
ESQNNEEAEAESLPILPSDIRDKNDISMSENFSDLPPFESFFPDDLQFENPITISDLFFEPDT  
LPDYNMMLFGSSTTDYGFSSSWPEEDFFQDFGDFVFGFDPLVAL

**SICRF3** > SL2.40ch01 (2911579-2910313): SL\_MboI0034O03\_SP6\_280529 , SGN-U573201 Tomato 200607#2 [3 ESTs aligned]: contig >SL1.03ct37214: Genbank #AK328278.1 Solanum lycopersicum cDNA, clone from fruit

SICRF3 DNA Sequence (1035bp)

**ATG**GCCTCCAAGGATGAACATAAGGAAAATGATGCAGTCGAGGAACCCCTCAGAAAT  
TCCCAGAGTTGAGAAATCTATCAACCCAGTGGGTGAAAGTTCTGTTGTCTTGCCGCG  
TGTTGTGCGTATTTACATGCCGACAGTGACGCCACAGACTCATCTAGTGACGAGGA  
GGAAAAGCTTCAAGGAGAGAAGTCCAAGAGACATAAAAGGACGTGTATAAAGGAA  
ATCATCATTGAGAATGGGAAGACCAGGGTCATTTCAAAGAAGACGTCCAAAGAGAA  
GAAAGATATAAAGATGTTCCAAGAAAATGCGAAGAAGTACAAAGGAGTTAGACAA  
CGGAGATGGGGCAAATGGGCAGCAGAGATCCGAGACACAAAAAACAAAACCTCGAC  
TTTGGCTGGGCAGTTTTGACACTGCTGAAGAAGCTGCTTTGGCTTATGATAAGGCAG  
CCATTGAAATAAGAGCAATGACCCCAAGGAAGAGCTTCAGGTAAGAGAGGGAGTC  
AAAGAACCCTCAGTAATTGCCCTAGTTGAAAAATCCAGCAATCAAGTGGGCGAAAT  
TTCCCAAGTCTTTCCACGTCTTGTACGTATTCACGCGCCGGACCATGACACAACAGA  
CTCGTCTAGTGACGAGGAGGAGAAGGATGAAGAAGAGAAGTCCGAGGGACATGAA  
AGGACGTGCGTAAAGGAAATCATCATCGAGAATGGAAAGACCAAGGACATTTCAA  
GAAGAAGTCCAAAGAGAAGAAAGCTTCGAATCTGATGCAAGAAGATGTGAATAAGT  
ACAGGGGAGTTAGACGACGAAAATGGGGTAAGTGGGCAGCAGAGATTCGAGATAC  
AAGAAAGAAAACCTCGGCTTTGGTTGGGAACCTTTTGATACTGCTTTAGAAGCTGCTTT  
GGCTTATGACAAGGCAGCCATTGAAATAAGAGGTGCTGATGCTTTAACTAACATCCT  
GAAGCCACCACCGAAGAAAACAACCCCATCAAGATCAACTTCATCGTGCCACCTC  
TAAAAGACAGAAGGCGGATCCA**TAG**

SICRF3 Protein Sequence (344AA)

MASKDEHKENDAVEEPSEIPRVEKSINPVGESSVVLPRVVRIYMPDSDATDSSSDEEEKL  
QGEKSKRHKRTCIKEIIIENGKTRVISKKSKEKKDIKMFQENAKKYKGVRQRRWGKWA  
AEIRDTKNKTRLWLGSFDTAEEAALAYDKAAIEIRAMTPKEELQVKEGVKEPSVIALVE  
KSSNQVGEISQVFPRLVRIHAPDHDTTSSSDEEEKDEEEKSEGHERTCVKEIIIENGKTK  
DISKKSKEKKASNLMQEDVNKYRGRRRKWKWAAEIRDTRKKTRLWLGTFTDALE  
AALAYDKAAIEIRGADALTNILKPPPKNNPIKINFIVPPLKRQKADP

SICRF3 (N-terminal)

MASKDEHKENDAVEEPSEIPRVEKSINPVGESSVVLPRVVRIYMPDSDATDSSSDEEEKL  
QGEKSKRHKRTCIKEIIIENGKTRVISKKSKEKKDIKMFQENAKKYKGVRQRRWGKWA  
AEIRDTKNKTRLWLGSFDTAEEAALAYDKAAIEIRA

SICRF3 (C-terminal)

MTPKEELQVKEGVKEPSVIALVEKSSNQVGEISQVFPRLVRIHAPDHDTTSSSDEEEKD  
EEKSEGHERTCVKEIIIENGKTKDISKKSKEKKASNLMQEDVNKYRGRRRKWKW  
AAEIRDTRKKTRLWLGTFTDALEAALAYDKAAIEIRGADALTNILKPPPKNNPIKINFIV  
PPLKRQKADP

**SICRF4** > SL2.40ch03 (2016125-2014935): Scaffold 06183: SGN-U574151 Tomato 200607  
Build 2 (2 members)

SICRF4 DNA Sequence (1191bp)

**ATG**GATTATCATTTCGCTGTGTCCGATCAAATACACTGAGCATCGGAATGTTATTAGA  
AAAGTTACTAAACCATCTTTGGTGAAATCAAAAAAAGCTCTCAGAAGCTGCAAATC  
CTCTCAGTTGAATCCCTCTGTTCCAAGGACTGTTTCGGATTTCTGTGACAGACCCAGA  
CGCAACCGATTCTTCAAGCGATGAAGAAGACCTGCTTTTTTGGACGGCGACGGGTGA  
AAAAGTACATCAATGAAATCAGTATTGAAACTGCCGTCAAGTGTGAAGTTAGCAGT  
GGAAATGGCAAACGGTGAATAAAAGAGCACCAGAGCCTCTTCAGACTAAGCAGA  
AGCCAATGAAAGTTCAGCCTCCTCCATCGGGCTGGTGCTGCTAGGAAGTTCCGCGGTG  
TGCGTCAACGGCCGTGGGGTAAATGGGGCGGCTGAGATCAGGGACCCAGCTCGCCGT  
GTTTCGGCTTTGGTTGGGAACCTACGATACTGCTGAAGAAGCTGCTATGGTTTATGAC  
AACGCTGCTATTAAGCTCCGTGGTCCCGATGCTTTAACAACCTTCAGCACTCCTGCC  
AAGGCCGAGCCAGAACCAGAACCAGAGCCAGAGCCCGAAATCAGTGCTCTGTCTCA  
CTCCGGCTATGAATCCGGGAATGAGTCCCGTAACATCCCCTCTCCAACCTTCTGTTTTA  
CGGTGTACAATGAGCCAATCAGAAAGCGGGTCCGGCCAGGTTTCATGTTTCGGAAGA  
GTGTCCTTCGGTTCAAGGATCGATGGAATGTGAGCAAACGGTTCAACCGTTTGTTC  
ATGTGCTGCTGAACCGCTGATTCCATCAGCGATTCCGCAGGACGTTGAGGAATGTCA  
GGGCGAGACCAGCATGATTCTGATTACTCAAGCGATTACTTGCCAACAGATATTCC  
ATTCTTAAATGATTTTTTCAATTTTCGATGGTTCAGCAGCTGAGCAAACGTTACTTGAG  
GACTCAACTATGACAGCCGTAACATCAACAACAACAACAACAACACCAAACGAATT  
TGGCGATTTGTGCAACGATTCATTGGATTTTGGGAATGATTTCTTGTTAACGATGCT  
GATTTTCGCTGAATTCGGCAGTTTTGATGATCTGGGTGATTTAGGAATGGATGATTTTT  
CTCAAGACAACAGTGTTGTTGATTATTCCAGTGTTGATTCTCTGTTAGCAATT**TGA**

SICRF4 Protein Sequence (396AA)

MDYHSLCPIKYTEHRNVIRKVTKPSLVKSKKLSEAAKSSQLNPSVPRTVVRISVTDPDATD  
SSSDEEDLLFGRRRVKKYINEISIEAVKCEVSSGNGKTVNKRPEPLQTKQKPMKVQPP  
PSAGAARKFRGVRQRPWGKWAAEIRDPAARRVRLWLGYDTAEEAAMVYDNAAIKLRG  
PDALTNFSTPAKAEPEPEPEPEPEISALSHSGYESGNESRNIPSPTSVLRCTMSQSESGSQ  
VHVSEECPSVQGSMECEQTVQPFVQCAAELIPSAIPQDVEECQGETSMIPDYSSDYLP  
DIPFLNDFNFDGSAAEQTLLEDSTMTAVTSTTTTTTPNEFGDLCNDSLDFGNDFLFNDA  
DFAEFGSFDDLGLGMDDFSQDNSVVDYSSVDSLLAI

**SICRF5** > SL2.40ch01 (78502891-78503773): SGN-U583231 Tomato 200607 Build 2 (3 members)

SICRF5 DNA Sequence (882bp)

**ATG**GAATCACAAAAAATCAAAAAGAAATTAGTCCACAAAACACTATCACTACTAAGTA  
TGATCATCACACAAGTGGACTCCTAAAGTTGTTCCGGATTTGTTACACTGATTGTGA  
TGCTACTGATTCTTCAAGCGACGACGATGACGACGAGAGGAATCGAGTGAAAAAAT  
ACGTTACAGAGATTAATTTGAGAAGAAAATGGCTGCTGCAGATGTGAGGAAATCG  
TTGAATTCGAATAAGAAGAAGAAGAAAGCGATCGATTTGAAGAGAGATGAGAATGT  
TAAAAAGTTTCGCGGTGTCAGACAGAGGCCATGGGGAAAATGGTCTGCGGAGATTC  
GAGATCCGGTGAAAAAACGAGGGTTTGGTTAGGTACTTTTGATACCGCTGAAGAA  
GCGGCTATGAAATATAATATAGCCGCTATTCAATTGCGCGGAGCTGATGCTATCATT  
AATTTTATTGAGACACCTTTCCCAAAGGAAAATGCGATCACTTCAGTATCGGATTAT  
GATTCCACAGGGGAATGTGAAAACCTCTGTTCTCCACCTCAGTTTTGAGGCAGAAT  
AATAACAATAATGATAAAGATAACGAAGATGCGATTGCGATTGATACTAAAATTAT  
GAACGATGAGAGCAAAAAAATGGAAATGGATGAAAATGGATTTATGTTTGATGATA  
ATTTGCCATTAATGGGTGAGAGTTTCCTTAAGGATTTCTTCGATTTTCGATCCCCTTC  
TCCATTGATGGATGATGTATTATTACCAGGTTTTAGCGATGGAATGGGATTATTACC  
AGAAGTGTTGAGTATTCATGGAAATAGAATGTTGGATGAAGATTTGGAGACTTGTA  
AGTGGGCAAATGATTTCTTCCAAGATGTTTGT**TGA**

SICRF5 Protein Sequence (293AA)

MESQKIKKKLVHKTITTKYDHHNKWTPKVVRICYTDCDATDSSSDDDDDERNRVKKYV  
TEIKFEKKMAAADVRKSLNSNKKKKKAIDLKRDENVKKFRGVRQRPWGKWSAEIRDP  
VKKTRVWLGTFTAEAAAMKYNIAAIQLRGADAIINFIETPPFKENAITSVSDYDSTGEC  
ENLCSPTSVLRQNNNNNDKDNEDAIAIDTKIMNDESKKMEMDENGFMFDDNLPLMGQS  
FLKDFDFRSPSPLMDDVLLPGFSDGMGLLPEVLSIHGNRMLDEDLETCKWANDFQDV  
C

**SICRF6** SL2.40ch06 (32043471-32044523) No Unigene

SICRF6 DNA Sequence (1053bp)

**ATG**GATCATCACAGTTCGCTTTGTCCGATCAAATATACCGAACACAAGAGAACAATC  
AGAAAAGTTACTAAGCCTTCCGTTATTAAGCCTAAGAAGGTATCAGATGTTCCGAAA  
TCCTCGGAGTATAATCCGAGGACTGTACGGATATGTGTTACTGATCCAGATGCAACT  
GACTCTTCAAGTGATGAAGATGAGCTTTTTGGGCGTAAGCGTGTGAAAAGATACATT  
AGTGAATCAGTATTGAGAGTCCATCAGTTAATGATGTGAAAACCTTTGAGTAGTGGT  
AATGGGAAGAAGCGAGTAGCTGAAGGTTTCGCAGGCCAAGCAGAAGGCGTTGAAAG  
GGAAGGAAGTGGCTGATAAAACGGTTCGGAAGTTCAGGGGAGTGCGTCAACGGCCG  
TGGGGTAAATGGGCTGCTGAAATCAGAGACCCAGCGCGTCGCGTTAGGCTCTGGTT  
AGGTACTIONTATGATACTGCTGAAGAAGCTGCTATGGTTTATGATAATGCAGCTATTAA  
GCTCCGTGGACCAGATGCTTTAACTAATTCATCACTCCTCCAATAAAAGAGAAGCC  
GGAAGTGAATGTGGCTTCGAATTCGGGGTACGAATCTGGTGATGAATCACACAATCT  
TTCTTCTCCTACCTCTGTTTTGCGGTTCAGAAGTAGCGAATCCAGTGAAGAAGCAGA  
ACCCGGTCTCGAAGACATAAAAGAAAATTGCACAGTATTGGTGAAGAAGAACCAA  
ACAGTGAGCACCTTGAGTGCCAAGGCGAGACACTTACAGTCATACCAGACTATTCA  
AATGACTACTTACCCACAGACGTTTCCTTCTTAGACGATTATTTCACTTTGCAGATG  
CAGAACAGTCACTGTTTAAATGACACAACAAGTTTCACCAATGATGATTTGTTTTCGT  
CTTGGGATTTCAAAATGACTCTGTGTTAGACCCAGAGATCTGCAAATTTGATGATT  
CATTTCTAGACTTGGGTGCATTAGAAGTGGATAATTATTTCAAAGACATTGGAGATT  
TTCCAGTGTTGATGTACTAATGGCGTTA**TAG**

SICRF6 Protein Sequence (350AA)

MDHHSSLCPIKYTEHKRTIRKVTKPSVIKPKKVSDVRKSSEYNPRTVTRICVTDPDATDSS  
DEDELFGRKRVKRYISEISIESPSVNDVKTLSSGNGKKRVAEGSQAKQKALKGKEVADK  
TVRKFRGVRQRPWGKWA AEIRDPARRVRLWLGTYDTAEEAAMVYDNAAIKLRGPDAL  
TNFITPPIKEKPEVNVASNSGYESGDESHNLSSPTSVLFRSSESSEEAEPLGLEDIKENCTV  
LVEEPPNSEHLECQGETLTVIPDYSNDYLPTDVSFLDDYFNFADAEQSLFNDTTSFTNDD  
LFSSWDFTNDSVLDPEICKFDDSFLLDGALEVDNYFKDIGDFSSVDVLMAL

**SICRF7** > SL2.40ch01(14595809-14596333): No Unigene

SICRF7 DNA Sequence (525bp)

**ATG**GCTTCCAAAGATGAGCTTCACGAAAATGAGGTTGTCAAAAACCAATCAAAGA  
TGCTAGAGGAAATAAAACCAATCTAATGGGAGATTGTTCTGTAGTCTTGCAACGTGT  
TGTACGGATTTACATAACGGACAATGACGCCACAGACTCATCTAGTGATGAGGAGG  
AAAATCATCAAGGAGAGAACTCCAAACGACAAAAAAGGATTTGCAAAGAAATTATC  
ATAAAAAATGGAAAGACCAATGTCACCTCAAAAATGGTATCCTCCAAAGAGAAAA  
TGTTACAAAAACGCACCAAGAAAATGTAAAGAAGTACAGGGGAGTTAGACAAAGA  
AAATGGGGAAGCTGGGTTGCAGAGATTCGAGATATAAGAATTAATAACGACGTTG  
GTTGGGAAGTTTTGCCACTGCTTATGAAGCTGCTTTGGCTTATGACAAGGCAGCCAT  
TGAAATAAAAGGTCCAAATGCTTTGACAAACATTCTTAAGCCGCCACCGAAGGAAA  
TCGACCCCATCAACCAT**TAA**

SICRF7 Protein Sequence (174AA)

MASKDELHENEVVKVQSKDARGNKTNLMGDCSVVLQRVVRIYITDNDATDSSSDDEEN  
HQGENSKRQKRICKEIIKNGKTNVTSKMVSSKEKNVTKTHQENVKKYRGVRRQKRWGS  
WVAEIRDIRINKRRWLGSFATAYEAALAYDKAAIEIKGPNALTNILKPPPKEIDPINH

**SICRF8** > SL2.40ch01 (2901188-2900649): No Unigene

SICRF8 DNA Sequence (540bp)

ATGACCACCAAGGATGAGCTAAAGAAGAATGAGGCACTCGAAAAATCCTCAAAGT  
TGTCAGAGTAAAAAAGTTCACCAAACAATTAGGTAAAAGTTCTATTATCATGCCGCA  
TGTTATACGTATTTATATGCAAGATAATGACGCCACAGACTCATCTAGTGATGATGA  
GGAAAATGTTCAAGGAGGAAAGTCCAAGCGCAATAAAATAATATGTAACGAAATCA  
TCATTGAAAAGAAAAACACCAAGGTCGTTTCAAAGAGGATGTCGTCCAAAAAGAAG  
AGAGATAAGAACTACTTCTAGAAAATGTGGAGAAGTACAGGGGAGTTAGACGGCG  
AGAATCTGGAAGGTGGGCAGCAGAGATTCGATATGGAAGAAAGGAAGCTCGACGA  
CGTTGGTTGGGAACTTTTGATACTTCTAGAGAAGCTGCTTTGGCTTATGACAAGGCA  
GCTATCGAAATAAAAGGTGCTAATGCTTTAACAAATATTCTCGATCCACCACCAAAG  
GAATCAACCCCATCAACACCGTGCCACCAATAA

SICRF8 Protein Sequence (179AA)

MTTKDELKKNEALEKSSKVVVRVKKFTKQLGKSSIIMPHVIRIYMQDNDATDSSSDDEEN  
VQGGKSKRNKIICNEIIIEKKNKTKVVSARMSSKKRDKKLLLENVEKYRGVRRRESGRW  
AAEIRYGRKEARRRWLGTFTDSREAAALAYDKAAIEIKGANALTNILDPPPKESTPSTPCH  
Q

**SICRF9**>SL2.40ch03: (62191449-62190256): No Unigene \*(formerly SICRFL3)

**SICRF9 DNA Sequence (1194bp)**

ATGAAGTTTGAAAAGGATGTTAAAAGGGAGAGGGTTATGGATGGTTGCATTAGTTC  
AGTGAGGAAAGTTCGCATAGTTTATGATGATCCTGATGCTACGGACTCTGAGAGCGA  
TGATGATCAGAATGCTGCTCGTTTCGATAAAAATGTGAACAGAATCAAGCGTGTTGT  
TAAGGAAATTGTTATTCCTGTTGTTTCATGGGAGAATGATTTTAAAAAATGTTCTAA  
ACTTGATAACATTAGGATTAAGATTCCAAGAAGATTCATGAAAATAAGAAGGTGC  
AGCTAAAATCGACCGCGTTGCCTAAAGGAGTTAGGATGAGGAAATGGGGGAAATAT  
GCAGCTGAGATCAGAGATCCCTCGCAGGGGAAAAGAATATGGTTAGGGACTTTTGA  
GACTGTGGAGGCGGCTTACAAGCATAACGAGGCAAAGAGGGCTGAATTTGATAGGA  
TTATTTCAATTGGGGAAGGGTAAGAATTTGAGCCCTGGTCCTGCTGAGTGTTCTATGG  
CGTGTACGTCTCATCCTACAAATGGGAAAAATCGTGTGTACTCACACCCTTCCCCGT  
CTTCGGTGCTAGATGTCCCCACATCATCAGCTGCTGCCCCGGTTGAGTCCAATGAAA  
ATCTAACGAGAGATATGGCTCGAATGCCAGATTCAGGTTCTGAAGATTTTAGCTTGA  
GTTTTGAGGACCAAATGCTTCATGAATTTATCAAACAAAGACAGGGCATTTCAGAAT  
TGATCGAACATCCTTTGATAGAACAAGGCTCGATCAGCAATAGCGTTATGGAGATG  
ACTGAAGTGAATATCAGGAAGAAAACGAAAGCCAGACAACCAACGATAGCAAGTT  
GTAAAATATTGACAAAGGGAAGTACTGAGGACTACAGTAATGACAAGTCCATTTTCAGT  
GTATTAACGAGCCTACAATCATGTCTCCTATTCATACAGAGCTGCTTCACTTGAAC  
ATCGAGGAAACAGCAGTTACGGGGAATAGCTTGAAACTTCTAGGCTTTGATGACAA  
TGCTTTATTTGATAAAGATATATCACAATTATTTGATCCATATGCAGATGCTATATGC  
TTGGACAACACTTTTCAATGCTGTGATGGTTGGAATGAGTGTGTTTATTGCAAAATTT  
TCAAAGATGAAGTCGACCTAGATGAAGTTGACTTAAGATGGTTAGATGCAGTTTTGG  
TATAA

**SICRF9 Protein Sequence (397AA)**

MKFEKDVKRERVMDGCISSVRKVRIVYDDPDATDSESDDDQNAARFDKNVNRIKRVV  
KEIVIPVVSWENDFKKCSKLDNIRIKDSKKIHENKKVQLKSTALPKGVRMRKWGKYAAE  
IRDPSQGKRIWLGTFETVEAASQAYEAKRAEFDRIISLGKGNLSPGPAECSMACTSHPT  
NGKNRVYSHSPSSVLDVPTSSAAPVESNENLTRDMARMPDSGSEDFSLSFEDQMLHE  
FIKQRQGISIELIEHPLIEQGSISNSVMEMTEVNIRKKTARQPTIASCKILTKGTEDYSNDK  
SIFSVLNEPTIMSPIHTELLHLNIEETA VTGNSLKLGFDDNALFDKDISQLFDPYADAICL  
DNTFQCCDGWNECVYCKIFKDEVLDLDEVDLRWLDAVLV



**SICRF10** > SL2.40ch05 (3622457-3621438): SGN-U578981 \*(formerly SICRFL1)  
gil157338783lemb|CAO42134.1 Tomato 200607#2 [10 ESTs aligned]

SICRF10 DNA Sequence (1020bp)

**ATG**TCCGAGTCTCGGAGACAATCTCAGAAATCGAAGATTAGGGAAGAATCAGCCCG  
ACCCATGAGGAAAATCCGGATCGTTTGTGACGACCCGGAAGCTACTGATTCATCTGA  
TGATGAAGGGGTTGATGTATCGAAACCCAAACGATTTGTTAGGGGAGATTTATCTTCC  
TGTTGTTAGCTCTTTTACCCTGAAAAAAGTACCTGAAACTGAAAGTTCTTGTCAAGA  
TAGCAACAATGGTGACAAAAAGAGAGCTAAAACCCCTAAAACCCCGAGTGGCCCTA  
GGCCCTCGTCTTCGAAATACCGAGGTGTTTCGTCAGCGTAAATGGGGTAAATGGGCTG  
CTGAAATTAGGGATCCTTTTAAATCTAGGAGGGTCTGGCTTGGTACTTATAATACTG  
CTGAAGAAGCTTCTCATGCTTATGAAATGAAAAGGCTTGAATTCGAAGCGATGGCTA  
AGAGTAATTCGAATACTGATGTGTCTGAGAAGAGCTCGAATAACGAATGCAACAAC  
AGAATCATCGAAAGGTCAACAATGCTGGTTGTGTATCAGAGGAGGATGACTCTGC  
TCAGAGTTTGGTCTCACATACTTCACACACATCTCCAGCATCAGTTTTTGAATGGAT  
TCATTGACTTCTGGTTCTGCTGCAGTGTCTGAGGTTAACAACAACGACAACTCGTC  
GTGCAGCTAGTGGATGTCGATAAGATGGGATTGATGGAGGATAGTTTATCGCTTGCT  
GACATTGGTGCACGAATGGATTTTCGATACGGAGATGGACATGTTCTTTGCTGGGAAT  
GATAATTTTGATCAGAATCTTGATGACTTTGCTGTGAATGATTTTCGAGGATCTTCCAA  
TATGTGGACTTGATGAGCAGTTGCCTGCTGGTTTACCTGATTTTGATTTTCGACTTTGA  
TTTTGATGGATAACAATGAAGCTTGTGCTTGGATGGATGATGTAGCAGCTACTCCATT  
GATGAATGGAACAACAACAACACCCCTCAATATTGCATTATGCCCA**TAA**

SICRF10 Protein Sequence (339AA)

MSESRRQSQKSKIREESARPMRKIRIVCDDPEATDSSDDEGVDSKPKRFVREIYLPVVSS  
FTLKKVPETESSCQDSNNGDKKRAKTPKTPSGPRPSSSKYRGVRQRKWGWKWA AEIRDPF  
KSRRVWLGTYN TAE EASHAYEMKRLEFEAMAKSNSNTDVSEKSSNNEC NKNHRKVN  
NAGCVSEEDDSAQSLVSHTSHTSPASVFEMDSLTS GSAAVSEVNNNDKLVVQLVDVDK  
MGLMEDSLSLADIGARMDFDTEM DMFFAGNDNFDQNLDDFAV NDFEDLPICGLDEQLP  
AGLPDFDFDFDFDGYNEACA WMDDVAATPLMNGTTTTTPLNIALCP

**SICRF11** > SL2.40ch04 (874453-875505): SGN-U572199 \*(formerly SICRFL2)  
gil157338783|embl|CAO42134.1 Tomato 200607#2 [4 ESTs aligned]

SICRF11 DNA Sequence (1053bp)

**ATG**CTTAAGCCTTTGTCATCAAAATTTGAGAATCTTGGTAGAAACATGAAGAAAAAA  
GTTGATACAAACAGATTAGTGAGGAAAATTAGGATTGTTTGTAATGATCCTGATGCT  
ACTGATGATTCCTCGGACGATGATTCGAGGTGTAAGCGTTTCGTTAGAGAGATTAAG  
TTGCAAATTGGCAACTCTTTTAATCTTAGAAAAGCCTCTGAGATTGAATGTTCAATTC  
AAGATAGTAACAATGGAGAGAAAAAAGAAAGAAGGTTTAGTTAAACCCCT  
GATCAACCAAGGCCAGCAGGGGGTTTATTATCGAAATACAAAGGTGTTTCGTC AAC  
GAAAATGGGGGAAATGGGCTGCTGAAATTCGTGATCCATTTAAAGGCAGACGTGTT  
TGGTTGGGTACCTATAATACCGCTGTGGAGGCTTCTCGAGCTTACGAATTGAAACGT  
CTTGAATTTGAACTAGGGCGAAGATCAGTAGGACAAATGTGTCTAAGCAGAGTTC  
TGGTTCAATGGTCTCCGAGTACCAAAATCAGAGCCAAAATGTTGCTAGTGGTGTCTC  
AGATGACTATGCAGAAAGCTCGGTATCACGTACTTCACACTCCTTGTCGTCATCATC  
AGTTCTTGAATTGGACACTTTAACTTCTGTATCCGCATCTGCTCCAATTTTAAGACTT  
AATGGCCCAAACGATAATGAAAAGGTGAGCAATGTTGCGCCTTTGGAGGCTAATGT  
TGTCGAGCAAGAAGTGCCTGAGTTGGCTATGATGGAGGAACTCTACCTCTGTCTCA  
AATTGGTGAAAGTATGGATCTTGATTTGGAGCTTGAGTCGTTCCCTCATTGGCGCTGA  
TGATTTCAATCAGCATTGGATGAGTTTGTGTCATGATTTTGAGGACCCTCCGGTT  
TATCTGATCGAGGGTATGAGCAGTTGCCTACTGGTTTGCCTGATTTTGATGACTTCA  
ATTTGATGGCTACAATGAATCCTTTTCTTGGATGGATGATGCTCCACGGACAAATG  
GAACACCCCTCAATATAGCATGCCCA**TAA**

SICRF11 Protein Sequence (350AA)

MLKPLSSKFENLGRNMKKKVDNRLVRKIRIVCNDPDATDDSSDDDSRCKRFVREIKLQ  
IGNSFNLRKASEIECSFQDSNNGEKKKKKEGLVKPLIQPRPAGGLLSKYKGVQRKWK  
WAAEIRDPFKRRVWLGTYN TAVEASRAYELKRLEFETRAKISR TNVSKQSSGSMVSEY  
QNQSQNVASGVSDDYAESSVSRTSHSLSSSVLELDLTSVSASAPILRLNPN DNEKVS  
NVAPLEANVVEQEVPELAMMEETLPLSQIGESMDLDLELESFLIGADDFNQHLDEFV  
VNFEDPPVYLIEGDEQLPTGLPDFDDFNFDGYNESFSWMDDAPRTNGTPLNIACP
